# Supplementary figures and images for: Genome-Wide Identification, Evolution, and Expression Analysis of RING Finger Gene Family in Solanum lycopersicum
Source: MDPI journal article supplement (doi:10.3390/ijms20194864), 2019-09-30

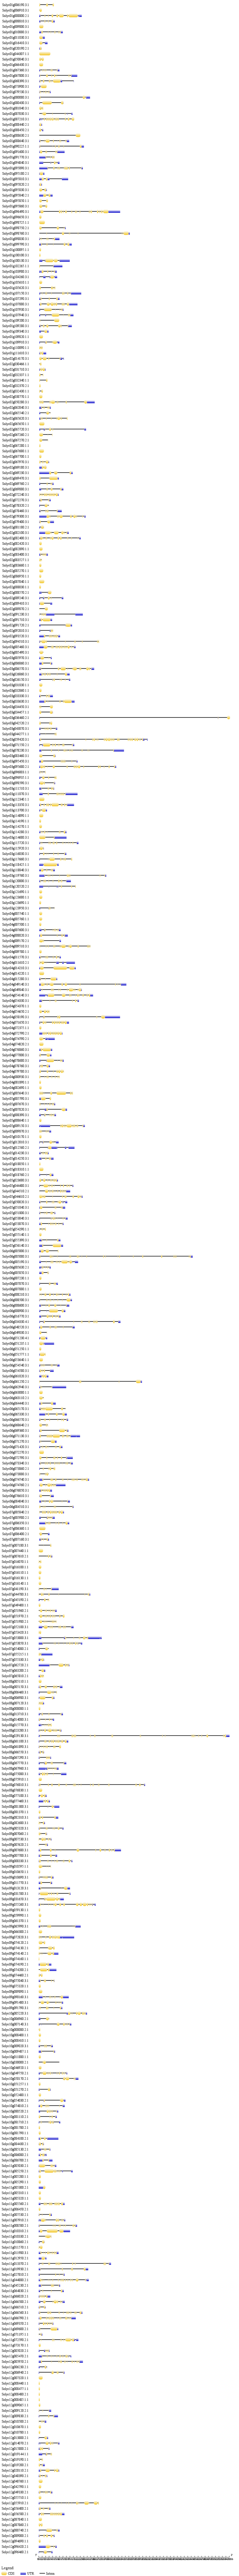

Supplement: s1 [file s1]
